# Supplementary material for: Surface charge transfer doping induced inversion layer for high-performance graphene/silicon heterojunction solar cells
Source: Royal Society of Chemistry journal article supplement (doi:10.1039/c6ta07100g), 2016-11-18
Supplement: c6ta07100g1.pdf [file c6ta07100g1.pdf]

## Supporting Information

### Surface Charge Transfer Doping Induced Inversion Layer for High-performance Graphene/Silicon Heterojunction Solar Cells

Ke Ding,<sup>a</sup> Xiujuan Zhang,<sup>a</sup> Feifei Xia,<sup>a</sup> Rongbin Wang,<sup>ab</sup> Yawei Kuang,<sup>ac</sup> Steffen Duhm,<sup>a</sup> Jiansheng Jie<sup>\*a</sup> and Xiaohong Zhang<sup>\*a</sup>

<sup>a</sup>*Institute of Functional Nano & Soft Materials (FUNSOM), Collaborative Innovation Center of Suzhou Nano Science and Technology (Nano-CIC), Jiangsu Key Laboratory for Carbon-Based Functional Materials & Devices, Soochow University, Suzhou, Jiangsu 215123, P. R. China. \*E-mail: jsjie@suda.edu.cn*

<sup>b</sup>*Institut für Physik, Humboldt-Universität zu Berlin, 12489 Berlin, Germany.*

<sup>c</sup>*School of Physics and Electronic Engineering, Changshu Institute of Technology, Changshu, Jiangsu 215500, P. R. China.*

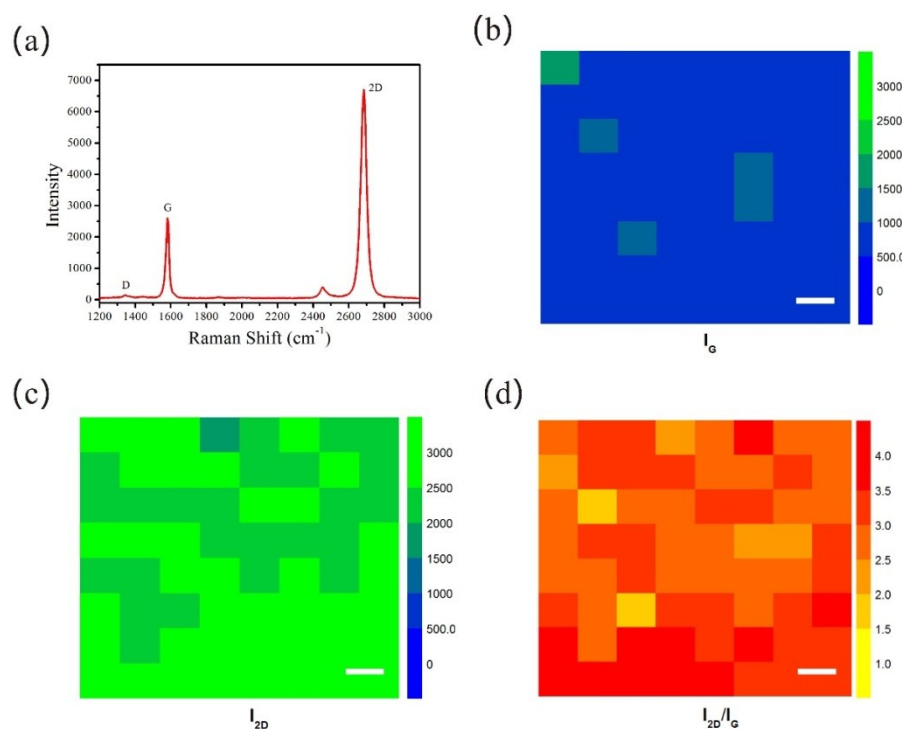

**Figure S1.** (a) Raman spectrum of the monolayer graphene. (b), (c) Intensity mapping for *G* and 2*D* peak, respectively. (d) Mapping of the intensity ratio of 2*D* and *G* peak. The scale bars are 1.5 μm.

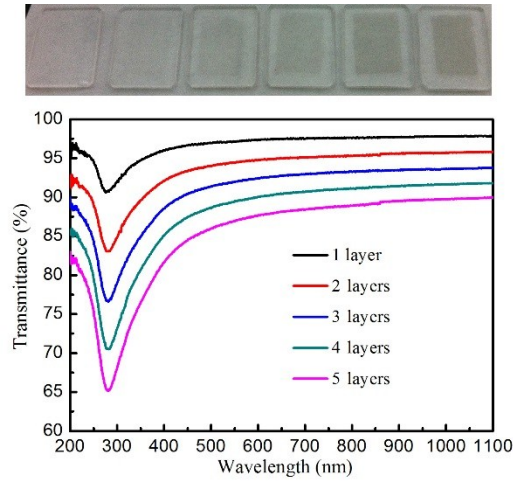

**Figure S2.** Transmittance spectra of graphene with different layer thickness. 3-layer graphene possesses a transmittance around ~93% at the visible to infrared light range.

**Table S1:** Sheet resistance of graphene with different layer thickness.

| Graphene layers                        | 1    | 2    | 3    | 4    | 5    |
|----------------------------------------|------|------|------|------|------|
| Sheet resistance ( $k\Omega/\square$ ) | 1.03 | 0.70 | 0.54 | 0.43 | 0.39 |

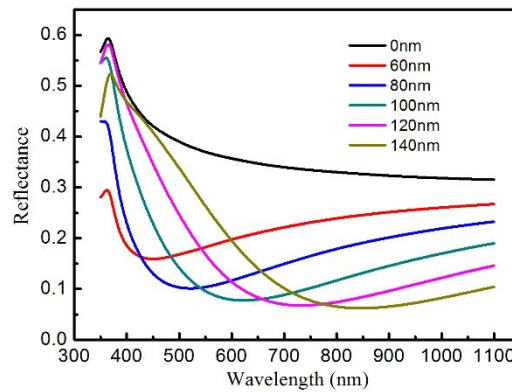

**Figure S3.** Finite Difference Time Domain (FDTD) based simulations of reflectance spectra of planar Si with different thickness of PMMA antireflection coating. 100 nm PMMA offers the best effect for reducing the optical loss of the device.
